# Supplementary material
Source: PubMed Central journal article supplement (PMC314130)

A

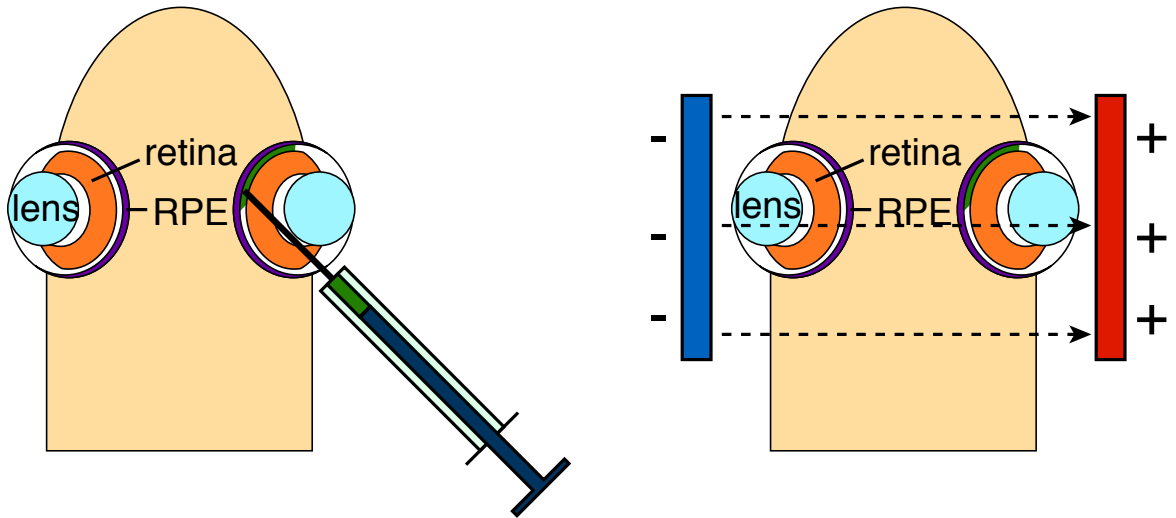

(1) DNA injection into subretinal space (2) electroporation

B

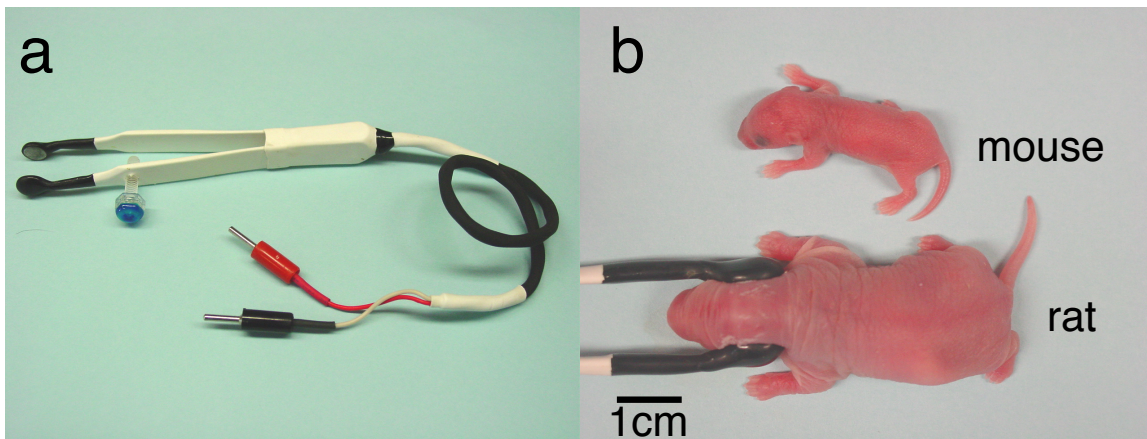

C

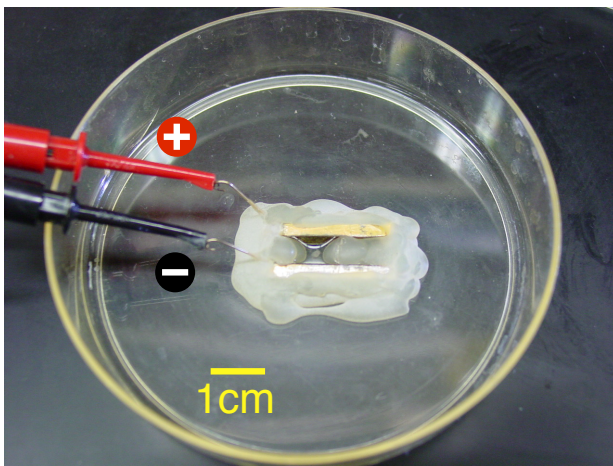

Supplement: pnas_101_1_16__2.pdf [file pnas_101_1_16__2.pdf]

RNAi vectors

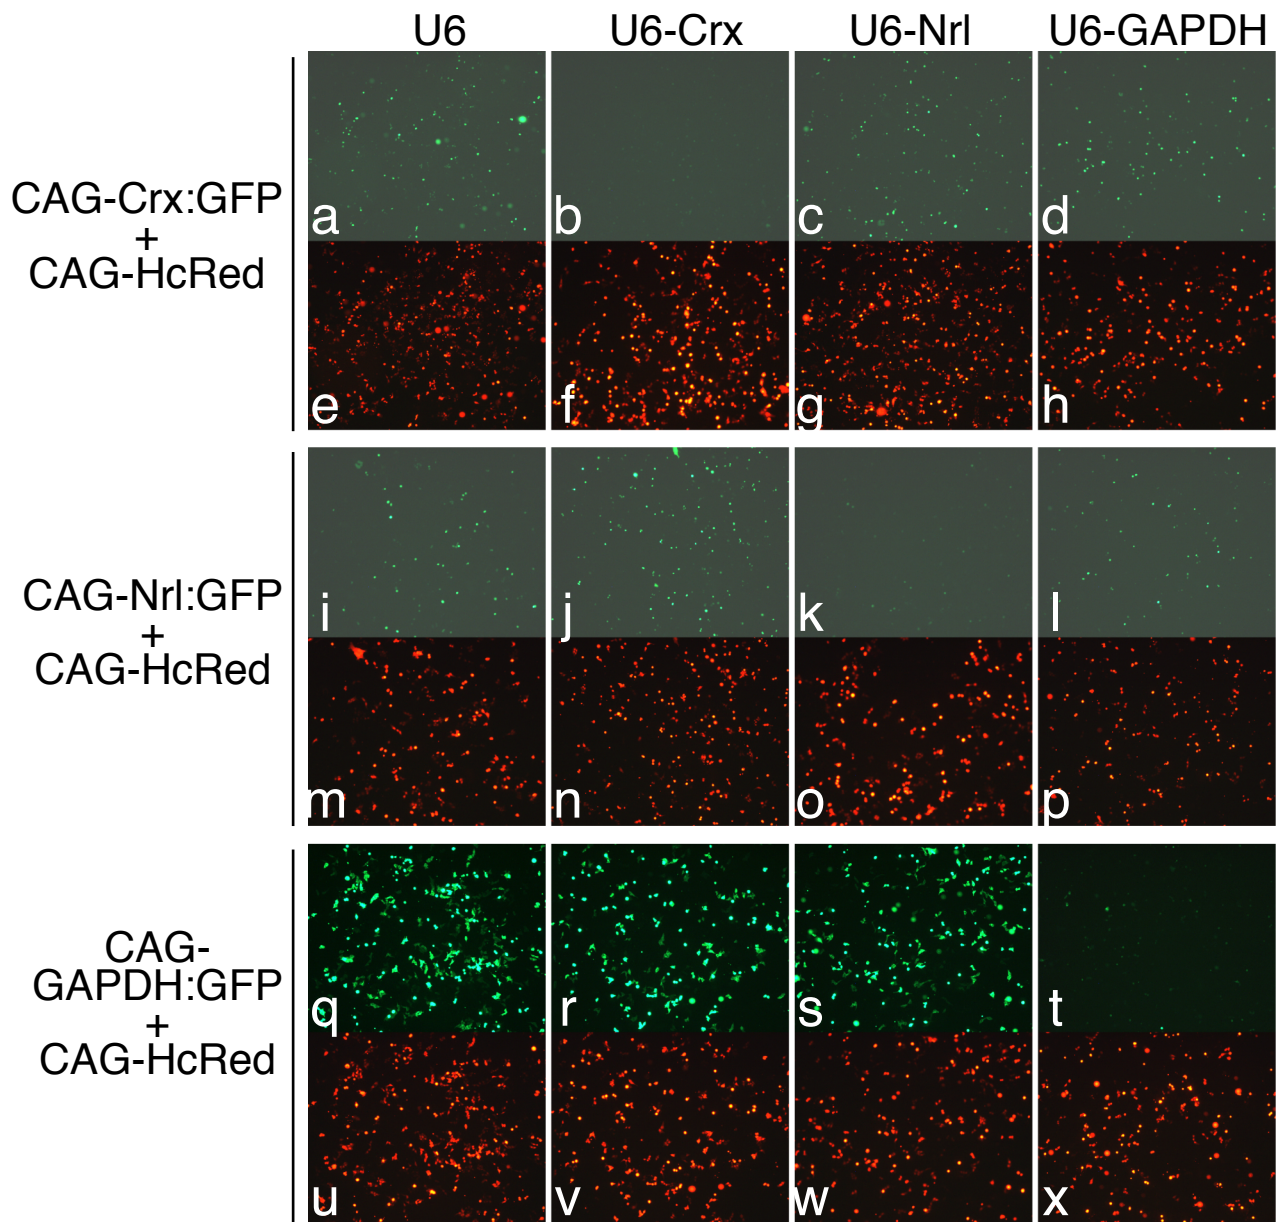

Supplement: pnas_101_1_16__4.pdf [file pnas_101_1_16__4.pdf]
